# Supplementary material
Source: PubMed Central journal article supplement (PMC9581340)
Supplement: NIHMS1803919-supplement-1.pdf [file NIHMS1803919-supplement-1.pdf]

**Table S1:** Input parameters for the Drude model, from reference [59].

| Metal | $\omega_p$ (PHz) | $\gamma_{bulk}$ (THz) |
|-------|------------------|-----------------------|
| Au    | 2.18             | 6.45                  |
| Ag    | 2.18             | 4.35                  |
| Pt    | 1.24             | 16.7                  |
| Cu    | 1.79             | 2.19                  |

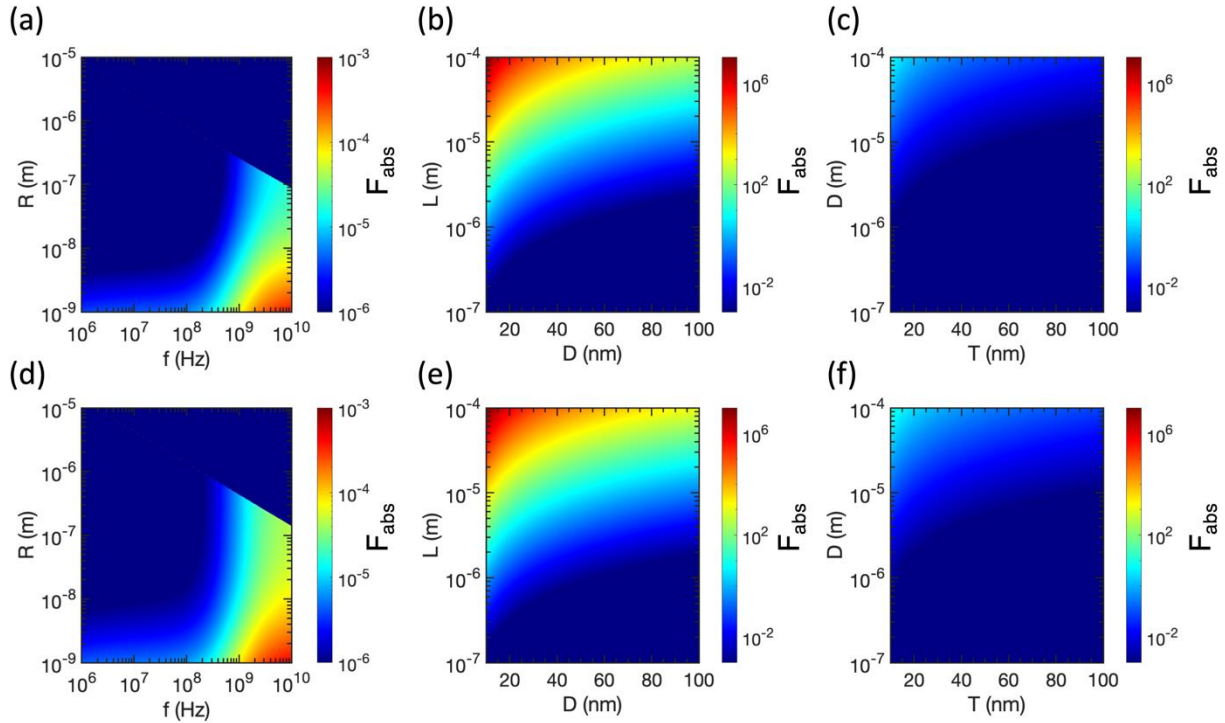

**Figure S1:** Lowest (minimum) case of differential heating for spherical gold particles in the pancreas (a), prolate gold spheroids in breast tissue (b), and oblate gold spheroids in breast tissue (c), obtained by calculations with the 7 pairs of  $\omega_p$  and  $\gamma_{bulk}$  reported in Table 1 of reference [60]. Highest (maximum) case of differential heating for spherical gold particles in the pancreas (d), prolate gold spheroids in breast tissue (e), and oblate gold spheroids in breast tissue (f), obtained by calculations with the 7 pairs of  $\omega_p$  and  $\gamma_{bulk}$  reported in Table 1 of reference [60]. Semi-axes that violate the electrostatic approximation are excluded from all plots.
